# Supplementary material for: Introducing BPA-equivalents: assessing mixture toxicity and substitution of BPA in environmental exposure scenarios
Source: Royal Society of Chemistry journal article supplement (doi:10.1039/d5em00802f), 2026-01-01
Supplement: d5em00802f2.xlsx [file d5em00802f2.xlsx]

## Sheet: TOC
Table of Content
Table S1. Chemical Name, molecular weight (g/mol), DTXSID, CAS numbers, physicochemical properties, predicted baseline cytotoxicity IC10,baseline,experimental absolute 10% cytotoxicity IC10,experimental absolute 10% effect concentration EC10, cytotoxicity, relative effect potencies (REPs) compared to BPA for nine BPA alternatives and BPA.
Table S2. Bioassay related information on cell lines, reference compounds, cell culture information
Table S3. Concentration levels of different BPA alternatives and BPA identified in surface water (compiled by Adamovsky et al 2023) and fraction of chemicals i in the mixtures pi.
Table S4. Example of how mixture stock solutions were prepared from 10 g/L methanol stocks of individual chemicals and subsequently diluted to obtain the dosing solutions used in the ERa assay. See legend below for explanation of columns.
Table S5: Experimental absolute 10% inhibitory concentrations (IC10) , Standard Error of Mean (SE) and selected fit model for the concentration-response curves (CRCs) of the mixtures. Prediction using the linear CA/IA model (eqn (10)
Table S6: Model Parameters and corresponding errors for the relative benchmark concentration EC50/IC50, slope b, and top in the ERα, MMP and Neurotox assays fitted with the log-logistic model (eqn (5)) with and without slope b fixed to 1.
Table S7: Experimental and predicted mixture effects (EC10) of the mixtures in the ERα-UAS-bla GripTite for ERα.
Table S8. Mixture predictions for estrogen receptor alpha activation of various BPA alternative mixtures, calculated based on published data from Lee et al. and Skledar et al.
Table S9: Experimental mixture effects (EC10) and predictions for CA and IA of the mixtures in the MMP assay for mitochondrial membrane potential inhibition in AREc32 cells
Table S11: Experimental mixture effects (EC10) and predictions for CA (EC10(CA)) of the mixtures in the AhR CALUX assay for the activation of the arylhydrocarbon receptor
Table S11: Experimental mixture effects (EC10) and predictions for CA (EC10(CA)) with index on prediction quality (IPQ) of the mixtures in the AhR CALUX assay for the activation of the arylhydrocarbon receptor
Table S12: BPA equivalent concentrations BEQchem of the mixtures based on predicted single chemical data (BPA-EQi) and experimental data of the mixture BPA-EQmix for the endpoints cytotoxicity, ERα, MMP, NOI
Table S13: Various simulated substitution scenarios discussed in Section 3.8.

## Sheet: S1
Table S1. Chemical Name, molecular weight (g/mol), DTXSID, CAS numbers, physicochemical properties, predicted baseline cytotoxicity IC10,baseline,experimental absolute 10% cytotoxicity IC10,experimental absolute 10% effect concentration EC10, cytotoxicity, relative effect potencies (REPs) compared to BPA for nine BPA alternatives and BPA.
V. Srebny, L. Henneberger, M. Konig, J. Huchthausen, J. Braasch and B. I. Escher, Beyond Estrogenicity: A Comparative Assessment of Bisphenol A and Its Alternatives in In Vitro Assays Questions Safety of Replacements, Environ Sci Technol, 2025, DOI: 10.1021/acs.est.5c07018
S. Endo and K.-U. Goss, Serum Albumin Binding of Structurally Diverse Neutral Organic Compounds: Data and Models, Chemical Research in Toxicology, 2011, 24, 2293-2301.
J. H. Kwon, H. M. Liljestrand and L. E. Katz, Partitioning of moderately hydrophobic endocrine disruptors between water and synthetic membrane vesicles, Environ Toxicol Chem, 2006, 25, 1984-1992.
*The EC10, MMP of BPAP was nondetect in Srebny et al. 2025 but the CRCs was reevaluated and an uncertain EC10 was added for BPAP
Mixture	Chemical name	Abbreviation	Short abbreviation	MW (g/mol)	DTXSID	CAS-Nr.	log Kow	Reference	pKa1	pKa2	Reference	log (Dlipw/(Lwater/kglipid) or (Lwater/Llipid)) (pH 7.4)	Reference	log (DBSAw /(Lw/Lprotein) (pH7.4))	Reference	IC10, baseline, ERα (M)	IC10, baseline, AREc32+MMP (M)	IC10, baseline, NOI (M)	IC10, baseline, AhR (M)	IC10, HEK293, ERα (M)	IC10, AREc32 (M)	IC10, SHS-5Y5, NOI (M)	IC10, H4IIe, AhR (M)	IC10, median (M)	EC10, ERα (M)	EC10, ARE (M)	EC10, MMP (M)		EC10, NOI (M)	EC10, AhR (M)	REPIC10, ERa	REPIC10,MMP	REPIC10, NOI	REPIC10,AhR	REPIC10,median	REPEC10, ERa	REPEC10, ARE	REPEC10, MMP	REPEC10, NOI	REPEC10, AhR
I	4,4'-(Propane-2,2-diyl)diphenol	Bisphenol A	BPA	228.291	DTXSID7020182	80-05-7	4.25	experimental, Srebny et al 2025	8.78	9.85	experimental, Srebny et al 2025	3.65	Kwon et al 2006	3.01	Endo and Goss 2011	1.18018e-05	2.5743e-05	2.00977e-05	2.5743e-05	4.27e-05	6.99654e-05	0.000237486		6.99654e-05	3.70399e-07	>IC10	2.80002e-05		5.07712e-05	0.0002641	1	1	1	1	1	1	-	1	1	1
I	4,4'-Sulfonyldiphenol	Bisphenol S	BPS	250.27	DTXSID3022409	80-09-1	1.97	experimental, Srebny et al 2025	7.28	8.16	experimental, Srebny et al 2025	1.76609	Srebny et al, 2025	2.14382	predicted, Srebny et al 2025	0.000504235	0.000634837	0.000593296	0.000634837	0.000519896	0.00139363	0.000195457	0.000237329	0.000378613	1.43e-06	>IC10	0.000117029		>IC10	>IC10	0.0821318	0.0502036	1.21503	0.10847	0.0821154	0.25902	-	0.239259	-	-
I	Bis(4-hydroxyphenyl)methane	Bisphenol F	BPF	200.23	DTXSID9022445	620-92-8	2.71	experimental, Srebny et al 2025	9.53	10.27	experimental, Srebny et al 2025	2.85421	Srebny et al, 2025	2.47764	predicted, Srebny et al 2025	4.70229e-05	7.12981e-05	6.24731e-05	7.12981e-05	0.000164154	0.000655961	0.000569085	0.000291837	0.000430461	9.95125e-07	>IC10	0.00016467		>IC10	>IC10	0.260121	0.106661	0.417313	0.08821	0.106707	0.372213	-	0.170038	-	-
II	4,4'-(1,1,1,3,3,3-Hexafluoropropane-2,2-diyl)diphenol	Bisphenol AF	BPAF	336.23	DTXSID7037717	1478-61-1	4.72	experimental, Srebny et al 2025	8.73	9.43	experimental, Srebny et al 2025	4.86921	Srebny et al, 2025	3.90474	predicted, Srebny et al 2025	3.3859e-06	1.08071e-05	7.16799e-06	1.08071e-05	9.46868e-06	1.84108e-05	6.64417e-05	3.11e-05	2.47554e-05	2.44e-08	>IC10	5.32173e-06		1.61516e-05	>IC10	4.5096	3.80024	3.57435	0.827748	3.80435	15.1803	-	5.26149	3.14343	-
II	4,4′-Ethylidenbisphenol	Bisphenol E	BPE	214.264	DTXSID3047891	2081-08-5	4.05	experimental, Srebny et al 2025	9.04	9.99	experimental, Srebny et al 2025	4.20163	Srebny et al, 2025	3.42904	predicted, Srebny et al 2025	6.1423e-06	1.68239e-05	1.21816e-05	1.68239e-05	6.74e-05	7.95867e-05	0.000279492	8.43e-05	8.19433e-05	4.01e-07	>IC10	3.20532e-05		0.000113788	6.19e-05	0.633531	0.879109	0.849708	0.305373	0.849462	0.923688	-	0.873554	0.446193	4.26656
II	4,4'-(Butane-2,2-diyl)diphenol	Bisphenol B	BPB	242.318	DTXSID4022442	77-40-7	3.72	experimental, Srebny et al 2025	9.53	10.33	experimental, Srebny et al 2025	3.87431	Srebny et al, 2025	3.19474	predicted, Srebny et al 2025	8.96614e-06	2.18284e-05	1.65151e-05	2.18284e-05	2.08723e-05	3.73357e-05	0.000167407	6.98e-05	5.35679e-05	1.35e-07	>IC10	1.63873e-05		2.79756e-05	>IC10	2.04577	1.87395	1.41862	0.36881	1.87668	2.74369	-	1.70865	1.81484	-
III	1,1'-Bis(4-hydroxyphenyl)cyclohexane	Bisphenol Z	BPZ	268.356	DTXSID4047963	843-55-0	4.64	experimental, Srebny et al 2025	9.35	10.14	experimental, Srebny et al 2025	4.80203	Srebny et al, 2025	3.84794	predicted, Srebny et al 2025	3.50883e-06	1.1072e-05	7.38919e-06	1.1072e-05	6.64119e-06	7.27456e-05	7.88975e-05	8.37576e-05	7.58215e-05	4.43442e-08	>IC10	2.21298e-05		3.04713e-05	8.04274e-05	6.42957	0.961782	3.01006	0.307351	0.962861	8.3528	-	1.26527	1.6662	3.28371
III	4,4'-(1-Phenylethylidene)bisphenol	Bisphenol AP	BPAP	290.362	DTXSID5051444	1571-75-1	5.06	experimental, Srebny et al 2025	9.1	9.99	experimental, Srebny et al 2025	5.22287	Srebny et al, 2025	4.14614	predicted, Srebny et al 2025	2.58604e-06	8.67045e-06	5.44266e-06	8.67045e-06	1.18211e-05	3.13902e-05	0.000105953	9.59264e-05	6.36583e-05	1.94101e-07	>IC10	2.82893e-05	*	5.12213e-05	>IC10	3.61219	2.2289	2.24143	0.268362	2.2293	1.90827	-	-	0.991213	-
III	2,2-Bis(2-hydroxy-5-biphenylyl)propane	Bisphenol PH	BPPH	380.487	DTXSID9058654	24038-68-4	6.66667	average prediction, Srebny et al 2025	9.48	10.59	experimental, Srebny et al 2025	6.85009	Srebny et al, 2025	5.28687	predicted, Srebny et al 2025	1.05403e-06	4.0847e-06	1.79653e-06	4.0847e-06	8.29566e-06	2.8581e-06	2.31365e-05	1.29e-05	1.05978e-05	>IC10	>IC10	1.96207e-06		>IC10	9.54e-06	5.14727	24.4796	10.2646	1.99558	10.2597	-	-	14.2707	-	27.6834
III	4-[[4-(Allyloxy)phenyl]sulfonyl]phenol	Bisphenol S-MAE	BPS-MAE	290.33	DTXSID10629100	97042-18-7	2.85	average prediction, Srebny et al 2025	8	-	ACD pKa/GALAS predicted, Srebny et al 2025	2.91195	Srebny et al, 2025	2.78929	predicted, Srebny et al 2025	5.06522e-05	9.29777e-05	7.85988e-05	9.29777e-05	0.000244181	0.000385621	0.000135835	8.24e-05	0.000190008	1.41e-05	>IC10	7.84574e-05		2.52075e-05	>IC10	0.17487	0.181436	1.74834	0.312415	0.181347	0.0262694	-	0.356884	2.01413	-

## Sheet: S2 
Table S2. Bioassay related information on cell lines, reference compounds, cell culture information
1König, M., Escher, B.I., Neale, P.A., Krauss, M., Hilscherova, K., Novak, J., Teodorovic, I., Schulze, T., Seidensticker, S., Kamal Hashmi, M.A., Ahlheim, J. and Brack, W. (2017). Impact of untreated wastewater on a major European river evaluated with a combination of in vitro bioassays and chemical analysis. Environ Pollut, 220(Pt B): 1220-1230. 10.1016/j.envpol.2016.11.011
2Brennan, J.C., He, G., Tsutsumi, T., Zhao, J., Wirth, E., Fulton, M.H. and Denison, M.S. (2015). Development of Species-Specific Ah Receptor-Responsive Third Generation CALUX Cell Lines with Enhanced Responsiveness and Improved Detection Limits. Environmental Science & Technology, 49(19): 11903-11912. 10.1021/acs.est.5b02906
3Escher, B.I., Dutt, M., Maylin, E., Tang, J.Y., Toze, S., Wolf, C.R. and Lang, M. (2012). Water quality assessment using the AREc32 reporter gene assay indicative of the oxidative stress response pathway. J Environ Monit, 14(11): 2877-2885. 10.1039/c2em30506b
4Lee, J., Konig, M., Braun, G. and Escher, B.I. (2024). Water Quality Monitoring with the Multiplexed Assay MitoOxTox for Mitochondrial Toxicity, Oxidative Stress Response, and Cytotoxicity in AREc32 Cells. Environ Sci Technol, 58(13): 5716-5726. 10.1021/acs.est.3c09844
5Lee, J., Huchthausen, J., Schlichting, R., Scholz, S., Henneberger, L. and Escher, B.I. (2022). Validation of an SH-SY5Y Cell-Based Acetylcholinesterase Inhibition Assay for Water Quality Assessment. Environ Toxicol Chem, 41(12): 3046-3057. 10.1002/etc.5490
Name of bioassay	Abbreviation	Cell line	Target	Provider	Method reference	Well plate	Medium	Source	Serum supplement	Source	Cell number	Reference compound	CAS-Nr	Test concentration range	Cytotoxicity detection method	Cytotoxicity cutoff?	Concentration-response model	Equation
ER alpha-UAS-bla GripTite	ERα	HEK293T	Estrogen Receptor ERα	invitrogen, now ThermoFisherScientific, (Waltham, MA, U.S.)	König et al. 20171	354663, Corning Inc., NY, USA	98% OptiMEM	Cat.11058021, GIBCO, (Waltham, MA, U.S.)	2% charcoal stripping (cs) fetal bovine serum (FBS)	12676029, GIBCO, (Waltham, MA, U.S.)	5000	17ß-Estradiol (E2)	50-28-2	9.79 ×10-14- 1.01 ×10-8 M	Cell Confluency (IncuCyte S3 Live-Cell Analysis System (Sartorius AG, Essen, Germany) and ToxBLAzer™ DualScreen Kit (Thermo Fisher Scientific) for Metabolic Experiments	<IC10	Log-logistic CRC	eqn (5)
AhR CALUX	AhR	H4IIe (based on rat hepatoma cells H4L7.5c2 with AhR Luc reporter)	Aryl hydrocarbon receptor	M. Denison, University of California, (CA, U.S.)	Brennan et al. 20152	356660, Corning Inc., NY, USA	90% DMEM	Cat.31966021, GIBCO, (Waltham, MA, U.S.)	10% fetal bovine serum	10099141, GIBCO, (Waltham, MA, U.S.)	3250	2,3,7,8-Tetrachloro-dibenzo-p-dioxin (TCDD)	1746-01-6	2.10 ×10-14- 2.15 ×10-10 M	Cell Confluency (IncuCyte S3 Live-Cell Analysis System (Sartorius AG, Essen, Germany)	<IC10	Linear low-effect model	eqn (3)
MitoOxTox	ARE*	AREc32 (based on MCF7 with plasmid pcDNA3.1 and pGL-8xARE)	Antioxidant response element	Cancer Research, U.K.	Escher et al 20123	3765, Corning Inc., NY, USA	90% DMEM	Cat.31966021, GIBCO, (Waltham, MA, U.S.)	10% fetal bovine serum	10099141, GIBCO, (Waltham, MA, U.S.)	2650	tert-Butyl hydroquinone (tBHQ)	1948-33-0	1.68 ×10-8- 1.73 ×10-5 M	Cell Confluency (IncuCyte S3 Live-Cell Analysis System (Sartorius AG, Essen, Germany)	<IC10	Linear low-effect model	eqn (3)
	MMP*		Mitochondrial Membrane Potential		Lee et al. 20244							Azoxystrobin	131860-33-8	6.72 ×10-8- 6.88 ×10-5 M	Cell Confluency (IncuCyte S3 Live-Cell Analysis System (Sartorius AG, Essen, Germany)	none	Log-logistic CRC	eqn (5)
Neurite Outgrowth Inhibition	NOI	SH-SY5Y	Neurotoxicity based on neurite outgrowth inhibition (NOI)	Sigma-Aldrich (St. Louis, MO, U.S.)	Lee et al. 20225	356667, Corning Inc., NY, USA	Neurobasal medium	Cat.12348017, GIBCO, (Waltham, MA, U.S.)	2% B-27 Supplement and 2% GlutaMAX Supplement	17504044, 35050061, GIBCO, (Waltham, MA, U.S.)	3100	Narciclasine	29477-83-6	9.13 ×10-11- 1.87 ×10-5 M	Live-dead staining with Nuclear Green LcS1 (138904, Abcam, Cambridge, U.K.) and propidium iodide (Abcam, Cambridge, U.K.)	none	Log-logistic CRC	eqn (5)
*both MMP and ARE are measured in the same well and cells as a muliplexed assay (MitoOxTox)

## Sheet: S3
Table S3. Concentration levels of different BPA alternatives and BPA identified in surface water (compiled by Adamovsky et al 2023) and fraction of chemicals i in the mixtures pi.
Data from literature review in Adamovsky, O.; Groh, K. J.; Białk-Bielińska, A.; Escher, B. I.; Beaudouin, R.; Mora Lagares, L.; Tollefsen, K. E.; Fenske, M.; Mulkiewicz, E.; Creusot, N.; Sosnowska, A.; Loureiro, S.; Beyer, J.; Repetto, G.; Štern, A.; Lopes, I.; Monteiro, M.; Zikova-Kloas, A.; Eleršek, T.; Vračko, M.; Zdybel, S.; Puzyn, T.; Koczur, W.; Ebsen Morthorst, J.; Holbech, H.; Carlsson, G…
													Molar fraction pi in mixture
Mixture		Chemical name	Abbreviation	Short abbreviation	MW (g/mol)	CAS-Nr.	Detected Concentration (min) (μg/L)	Detected Concentration (max) (μg/L)	Detected Concentration (min) (mol/L)	Detected Concentration (max) (mol/L)	Detected Concentration (median) (mol/L)		I	II	III	I+II	I+III	II+III	I+II+III
I		4,4'-(Propane-2,2-diyl)diphenol	Bisphenol A	BPA	228.291	80-05-7	0.219655	0.489335	9.62173e-10	2.14347e-09	1.55282e-09		0.288264			0.11199	0.106135		0.0671943
(existing occurence and bioassay data)		4,4'-Sulfonyldiphenol	Bisphenol S	BPS	250.27	80-09-1	0.840246	0.799827	3.35736e-09	3.19586e-09	3.27661e-09		0.608264			0.236311	0.223956		0.141786
		Bis(4-hydroxyphenyl)methane	Bisphenol F	BPF	200.23	620-92-8	0.0940111	0.1292	4.69516e-10	6.45258e-10	5.57387e-10		0.103472			0.0401991	0.0380973		0.0241194
III		4,4'-(1,1,1,3,3,3-Hexafluoropropane-2,2-diyl)diphenol	Bisphenol AF	BPAF	336.23	1478-61-1	0.132	0.683333	3.92588e-10	2.03234e-09	1.21246e-09			0.142999		0.0874436		0.0684133	0.0524661
(existing occurence data,		Bisphenol E	Bisphenol E	BPE	214.264	2081-08-5	0.03	1.00327	1.40014e-10	4.68239e-09	2.4112e-09			0.284378		0.173897		0.136052	0.104338
but missing bioassay data)		4,4'-(Butane-2,2-diyl)diphenol	Bisphenol B	BPB	242.318	77-40-7	0.047	2.306	1.9396e-10	9.51642e-09	4.85519e-09			0.572623		0.350159		0.273954	0.210095
III		1,1'-Bis(4-hydroxyphenyl)cyclohexane	Bisphenol Z	BPZ	268.356	843-55-0					2.31094e-09				0.25		0.157953	0.130395	0.1
(no occurence data,		4,4'-(1-Phenylethylidene)bisphenol	Bisphenol AP	BPAP	290.362	1571-75-1					2.31094e-09				0.25		0.157953	0.130395	0.1
but often tested in bioassays		2,2-Bis(2-hydroxy-5-biphenylyl)propane	BisOPP-A	BPPH	380.487	24038-68-4					2.31094e-09				0.25		0.157953	0.130395	0.1
–set to 10% of total mix)		4-[[4-(Allyloxy)phenyl]sulfonyl]phenol	BPS-MAE	BPS-MAE	290.33	97042-18-7					2.31094e-09				0.25		0.157953	0.130395	0.1

## Sheet: S4
Table S4. Example of how mixture stock solutions were prepared from 10 g/L methanol stocks of individual chemicals and subsequently diluted to obtain the dosing solutions used in the ERa assay. See legend below for explanation of columns.
EC10,i (CA), IC10,i (CA):		predicted mixture effect and inhibitorry concentrations used for mixture calculation in (M)
pᵢ:		proportional contribution of each component
MW:		molecular weight in g/mol
cstock:		stock concentration of each component in M
Vmix stock:		total mixture volume prepared in µL
cmix, Stock:		final concentration in the mixture stock (0.01 M)
VStock,i in Mix:		volume of each stock in the mixture in µL
Dilution factor:		further dilution to assay dosing vial
Vdosing vial Total:		volume of the dosing solution in µL
Vmix stock, in dosing vial:		volume of the mixture stock solution in the dosing vial
Mixture	Chemical	initial prediction EC10 (CA)(M)	12×EC10 (CA)(M)	initial prediction IC10 (CA)(M)	12×IC10 (CA)(M)	pi	MWi (g/mol)	cStock, i (gL)	cStock, i (M)	V Stock, i in Mix-Stock (µL)	Dilution needed of cmix, Stock	Vdosing vial Total	Vmix stock, in dosing vial	Highest Cmix in exposure plate
I		5.89483e-07	7.07379e-06	0.000100046	0.00120055					761.108	10	120	14.4066	0.001
	BPA					0.29	228.291	10	0.0438037	66.2044
	BPS					0.61	250.27	10	0.0399568	152.665
	BPF					0.1	200.23	10	0.0499426	20.023
II		5.59487e-08	6.71384e-07	1.86257e-05	0.000223509					877.406	10	120	26.821	0.000495
	BPAF					0.14	336.23	10	0.0297415	23.5361
	BPE					0.28	214.264	10	0.0466714	29.997
	BPB					0.57	242.318	10	0.0412681	69.0606
III		2.82026e-08	3.38431e-07	9.65176e-06	0.000115821					907.785	10	120	13.8985	0.0003
	BPZ					0.25	268.356	10	0.0372639	20.1267
	BPAP					0.25	290.362	10	0.0344398	21.7772
	BPPH					0.25	380.487	10	0.0262821	28.5365
	BPS-MAE					0.25	290.33	10	0.0344436	21.7748
I+II		8.62909e-08	1.03549e-06	2.72374e-05	0.000326849					853.19	10	120	39.2219	0.0006
	BPA					0.11	228.291	10	0.0438037	15.0672
	BPS					0.24	250.27	10	0.0399568	36.0389
	BPF					0.04	200.23	10	0.0499426	4.80552
	BPAF					0.09	336.23	10	0.0297415	18.1564
	BPE					0.17	214.264	10	0.0466714	21.8549
	BPB					0.35	242.318	10	0.0412681	50.8868
I+III		4.34269e-08	5.21123e-07	1.44632e-05	0.000173559					914.528	10	120	20.827	0.000303
	BPA					0.11	228.291	10	0.0438037	7.5336
	BPS					0.22	250.27	10	0.0399568	16.5178
	BPF					0.04	200.23	10	0.0499426	2.40276
	BPZ					0.16	268.356	10	0.0372639	12.8811
	BPAP					0.16	290.362	10	0.0344398	13.9374
	BPPH					0.16	380.487	10	0.0262821	18.2634
	BPS-MAE					0.16	290.33	10	0.0344436	13.9358
II+III		3.69752e-08	4.43703e-07	1.2543e-05	0.000150516					916.36	10	120	18.0619	0.0003
	BPAF					0.07	336.23	10	0.0297415	7.06083
	BPE					0.14	214.264	10	0.0466714	8.99909
	BPB					0.27	242.318	10	0.0412681	19.6278
	BPZ					0.13	268.356	10	0.0372639	10.4659
	BPAP					0.13	290.362	10	0.0344398	11.3241
	BPPH					0.13	380.487	10	0.0262821	14.839
	BPS-MAE					0.13	290.33	10	0.0344436	11.3229
I+II+III		4.73119e-08	5.67743e-07	1.57551e-05	0.000189061					919.87	10	120	22.6873	0.000297
	BPA					0.07	228.291	10	0.0438037	4.79411
	BPS					0.14	250.27	10	0.0399568	10.5113
	BPF					0.02	200.23	10	0.0499426	1.20138
	BPAF					0.05	336.23	10	0.0297415	5.04345
	BPE					0.1	214.264	10	0.0466714	6.42792
	BPB					0.21	242.318	10	0.0412681	15.266
	BPZ					0.1	268.356	10	0.0372639	8.05068
	BPAP					0.1	290.362	10	0.0344398	8.71086
	BPPH					0.1	380.487	10	0.0262821	11.4146
	BPS-MAE					0.1	290.33	10	0.0344436	8.7099

## Sheet: S5 
Table S5: Experimental absolute 10% inhibitory concentrations (IC10) , Standard Error of Mean (SE) and selected fit model for the concentration-response curves (CRCs) of the mixtures. Prediction using the linear CA/IA model (eqn (10)
Preference was given for the linear CRC (eqn(3)), if that did not yield an IC10 then the log-logistic CRC (eqn 5) was used and intrapolated to the absolute IC10 (eqn (6))
Cytotoxicity		Prediction
Mixture	IC10, median	IC10 (CA)	Model used for IC10(CA/IA) prediction
I	0.000138555	0.000167588	eqn (10)
II	3.15133e-05	5.01591e-05	eqn (10)
III	3.24e-05	3.11237e-05	eqn (10)
I+II	5.74829e-05	6.89209e-05	eqn (10)
I+III	5.91279e-05	4.44503e-05	eqn (10)
II+III	5.10497e-05	3.80281e-05	eqn (10)
I+II+III	3.54963e-05	4.63874e-05	eqn (10)
HEK293 (ERα)	Experimental			CA prediction
Mixture	IC10 (exp)	SE IC10 (exp)	Model used for IC10 fit	IC10 (CA/IA)	Model used for IC10(CA/IA) prediction
I	5.8364e-05	1.19065e-07	eqn (3)	0.000116942	eqn (10)
II	1.52668e-05	4.53293e-08	eqn (3)	2.13876e-05	eqn (10)
III	2.41777e-05	1.89811e-06	eqn (5)	1.67178e-05	eqn (10)
I+II	2.43904e-05	1.40828e-06	eqn (5)	3.13347e-05	eqn (10)
I+III	2.38653e-05	1.00797e-07	eqn (3)	2.44253e-05	eqn (10)
II+III	1.40056e-05	9.71382e-07	eqn (5)	1.86678e-05	eqn (10)
I+II+III	1.54937e-05	1.52398e-06	eqn (5)	2.32155e-05	eqn (10)
MCF7 (AREc32)	Experimental			CA prediction
Mixture	IC10 (exp)	SE IC10 (exp)	Model used for IC10 fit	IC10 (CA)	Model used for IC10(CA/IA) prediction
I	0.000147161	3.60241e-07	eqn (3)	0.000212121	eqn (10)
II	2.89538e-05	4.52052e-08	eqn (3)	3.74849e-05	eqn (10)
III	3.06136e-05	5.10279e-08	eqn (3)	8.29929e-05	eqn (10)
I+II	5.08491e-05	7.08565e-08	eqn (3)	5.51124e-05	eqn (10)
I+III	4.16694e-05	7.04305e-08	eqn (3)	0.000106968	eqn (10)
II+III	3.69526e-05	8.25281e-08	eqn (3)	5.24999e-05	eqn (10)
I+II+III	3.09449e-05	2.5038e-08	eqn (3)	6.36677e-05	eqn (10)
MCF7 (AREc32) (live-dead stain)		Experimental		CA prediction
Mixture	IC10 (exp)	SE IC10 (exp)	Model used for IC10 fit	IC10 (CA)	Model used for IC10(CA/IA) prediction
I	0.000138555	3.22963e-07	eqn (3)	0.000237108	eqn (10)
II	3.15133e-05	5.23902e-08	eqn (3)	3.96822e-05	eqn (10)
III	3.24154e-05	4.13763e-08	eqn (3)	6.61788e-05	eqn (10)
I+II	5.74829e-05	9.22452e-08	eqn (3)	5.86565e-05	eqn (10)
I+III	5.91279e-05	1.06974e-07	eqn (3)	9.00911e-05	eqn (10)
II+III	5.10497e-05	1.31503e-07	eqn (3)	5.01564e-05	eqn (10)
I+II+III	3.54963e-05	2.63663e-08	eqn (3)	6.14504e-05	eqn (10)
SH-SY5Y (NOI)	Experimental			CA prediction
Mixture	IC10 (exp)	SE IC10 (exp)	Model used for IC10 fit	IC10 (CA)	Model used for IC10(CA/IA) prediction
I	0.00029899	3.27358e-07	eqn (3)	0.000221846	eqn (10)
II	0.00017121	1.09308e-05	eqn (5)	0.000151739	eqn (10)
III	0.00152427		eqn (5)	0.00013571	eqn (10)
I+II	0.000213868	2.89612e-07	eqn (3)	0.000172975	eqn (10)
I+III	0.000467561	3.10074e-05	eqn (5)	0.000158346	eqn (10)
II+III	0.000333156	4.75524e-05	eqn (5)	0.000142933	eqn (10)
I+II+III	0.000213414	8.16193e-06	eqn (5)	0.000155856	eqn (10)
H4Ile (AhR)	Experimental			CA prediction
Mixture	IC10 (exp)	SE IC10 (exp)	Model used for IC10 fit	IC10 (CA)	Model used for IC10(CA/IA) prediction
I	9.76292e-05	6.17197e-08	eqn (3)	0.000221846	eqn (10)
II	4.78472e-05	4.05268e-08	eqn (3)	0.000151739	eqn (10)
III	4.85737e-05	3.03825e-08	eqn (3)	0.00013571	eqn (10)
I+II	7.2888e-05	8.98096e-08	eqn (3)	0.000172975	eqn (10)
I+III	6.12991e-05	4.04349e-08	eqn (3)	0.000158346	eqn (10)
II+III	7.74192e-05	9.89432e-08	eqn (3)	0.000142933	eqn (10)
I+II+III	6.49043e-05	5.61759e-08	eqn (3)	0.000155856	eqn (10)

## Sheet: S6
	Table S6: Model Parameters and corresponding errors for the relative benchmark concentration EC50/IC50, slope b, and top in the ERα, MMP and Neurotox assays fitted with the log-logistic model (eqn (5)) with and without slope b fixed to 1.
			Effect, slope b and Emax fitted						Effect and Emax fitted, slope b = 1
	Chemical or mixture	Assay	logEC50,relative	SE log EC50,relative	Emax	SE Emax	slope b	SE b	logEC50,relative	SD log EC50,relative	Emax	SD Emax
Chemicals	BPA	ERa	-6.402	0.03619	37.72	1.348	1.971	0.2944	-6.305	0.06834	42.72	1.96
	BPS	ERa	-5.407	0.02475	69.58	1.612	1.73	0.1403	-5.278	0.04167	80.09	2.345
	BPF	ERa	-5.592	0.05197	61.44	2.792	1.576	0.2502	-5.482	0.07411	68.97	3.371
	BPAF	ERa	-7.263	0.04779	43.03	1.986	1.401	0.1706	-7.132	0.05558	49.04	2.067
	BPE	ERa	-5.966	0.04808	55.7	2.282	1.435	0.1823	-5.869	0.06002	61.47	2.459
	BPB	ERa	-6.976	0.03792	26.3	1.151	1.8	0.2267	-6.719	0.06466	34.34	2.039
	BPZ	ERa	-7.177	0.1329	24.27	2.778	0.9545	0.2228	-7.196	0.07537	23.81	1.185
	BPAP	ERa	-6.618	0.05581	25.68	1.594	1.737	0.3012	-6.422	0.09008	31.89	2.478
	BPPH	ERa	no effect						no effect
	BPS-MAE	ERa	-4.544	0.2094	41.85	10.94	1.343	0.3812	-4.254	0.1685	58.67	12.8
Mixture	I	ERa	-5.995	0.02086	47.27	1.029	1.811	0.1257	-5.819	0.04411	56.68	1.984
	II	ERa	-6.891	0.03338	28.98	0.8412	1.677	0.1893	-6.811	0.05283	31.69	1.055
	III	ERa	-6.408	0.05991	17.5	1.27	2.013	0.4369	-6.253	0.1083	20.83	1.981
	I+II	ERa	-6.774	0.048	30.75	1.096	1.32	0.1711	-6.723	0.05589	32.45	1.045
	I+III	ERa	-6.452	0.03727	24.07	0.9188	1.765	0.2176	-6.304	0.06266	28.14	1.354
	II+III	ERa	-6.642	0.07506	30.17	2.859	1.418	0.1774	-6.359	0.07362	41.66	3.788
	I+II+III	ERa	-6.609	0.03212	28.1	0.762	1.488	0.136	-6.516	0.04436	30.76	0.8963
			Effect, slope b and Emax fitted						Effect and slope b fitted, Emax = 100%
	Chemical or mixture	Assay	logEC50,relative	SE log EC50,relative	Emax	SE Emax	slope b	SD b	logEC50	SD log EC50	slope b	SE b
Chemicals	BPS	MMP	-3.6272	0.0250255	83.6873	2.19671	3.01736	0.42715	-4.23	0.02827	2.686	0.4266
	BPF	MMP	-3.37021	0.0650965	95.0437	6.63672	2.26117	0.48077	-3.469	0.03298	1.796	0.2167
	BPA	MMP	-4.2903	0.033184	90.9442	2.44792	3.42909	0.603763	-3.38	0.04265	1.999	0.3506
	BPB	MMP	-4.54447	0.0285449	91.4736	3.29181	3.69285	0.563215	-4.949	0.01887	2.678	0.2723
	BPE	MMP	-4.23258	0.032358	92.9597	3.83953	3.18722	0.498569	-4.194	0.02996	2.809	0.4768
	BPZ	MMP	-4.47161	0.0176348	91.7442	3.88912	6.05557	1.47346	-4.503	0.02912	3.15	0.5834
	BPAF	MMP	-4.98301	0.016397	93.3893	1.84005	3.12168	0.304601	-4.453	0.02115	4.964	1.313
	BPAP	MMP	-4.29651	0.044215	102.055	10.4415	3.84874	0.981313	-4.306	0.02402	3.937	0.8493
	BPPH	MMP	-5.41873	0.0188011	92.34	1.37173	3.11719	0.312049	-5.377	0.01722	2.756	0.2719
	BPS-MAE	MMP	-3.77684	0.0339628	88.9994	2.97977	2.88683	0.505003	-3.747	0.03492	2.091	0.3096
Mixture	I	MMP	-4.09391	0.0199568	91.9538	1.82504	3.26021	0.336052	-4.047	0.01997	2.697	0.2966
	II	MMP	-4.47356	0.00908976	95.1721	1.19976	3.76858	0.271234	-4.457	0.01204	3.285	0.2671
	III	MMP	-4.63865	0.0225625	91.9387	1.89282	3.03724	0.343807	-4.602	0.02534	2.251	0.2626
	I+II	MMP	-4.50751	0.0129826	93.9548	1.46475	3.10936	0.335915	-4.498	0.01713	2.043	0.1452
	I+III	MMP	-4.28273	0.00947438	90.8421	1.59602	8	1.62934	-4.336	0.02901	2.32	0.3222
	II+III	MMP	-4.50866	0.0266136	91.9528	2.12466	4.24934	0.729535	-4.464	0.03389	2.207	0.3389
	I+II+III	MMP	-4.61708	0.0384477	94.0587	2.07381	2.45716	0.426891	-4.515	0.02886	1.817	0.1959
Chemicals	BPS	NOI	-3.06628	0.433003	54.9073	53.7765	2.04122	1.14504	-3.518	0.01693	1.698	0.1076
	BPF	NOI	-3.08686	0.105192	36.2966	9.61666	5.98281	3.94941	-2.516	0.06571	1	fixed
	BPS-MAE	NOI	-4.60806	0.0847642	19.0562	1.87125	2.79326	1.1864	-2.151	0.1441	1	fixed
	BPA	NOI	-3.4857	0.0604729	109.514	10.0379	1.57939	0.17764	-4.197	0.01427	2.62	0.1977
	BPB	NOI	-3.8551	0.0723837	86.3401	7.17992	1.592	0.265924	-3.345	0.03362	2.212	0.3528
	BPE	NOI	-3.49102	0.0242034	92.8371	3.83995	6.63532	1.88864	-3.689	0.02751	1.307	0.1035
	BPZ	NOI	-4.20095	0.0242413	80.5255	4.12879	5.14834	0.747169	-4.114	0.01291	3.837	0.4386
	BPAF	NOI	-4.13379	0.0415113	115.46	9.74934	2.30407	0.291956	-3.944	0.01837	2.817	0.2937
	BPAP	NOI	-4.0113	0.0245681	88.9277	5.0548	3.16315	0.524524	-4.544	0.007875	6.819	0.682
	BPPH	NOI	-4.55765	0.00775866	93.7926	1.18365	8	0.887754	-3.411	0.08179	0.9921	0.1819
Mixture	I	NOI	-3.31081	0.0430982	114.819	15.953	3.61626	0.711036	-3.348	0.01775	4.168	0.6291
	II	NOI	-3.72908	0.0686366	86.923	7.3275	2.69801	0.575651	-3.654	0.0255	2.132	0.2427
	III	NOI	-2.72408	0.0211025	94.7416	9.02998	8	1.96425	-2.518	0.07246	1.843	0.4349
	I+II	NOI	-3.75471	0.0824509	110.963	21.8212	2.72976	0.593566	-3.775	0.02297	2.639	0.3338
	I+III	NOI	-3.20257	0.0340633	88.3149	5.41018	7.05605	2.59022	-3.166	0.02311	3.518	0.6486
	II+III	NOI	-3.39741	0.020228	85.3031	4.84777	8	2.81531	-3.36	0.03469	2.468	0.4355
	I+II+III	NOI	-3.62249	0.0178129	82.0911	4.53683	7.32535	2.42173	-3.542	0.02265	2.873	0.4042

## Sheet: S7 
Table S8. Mixture predictions for estrogen receptor alpha activation of various BPA alternative mixtures, calculated based on published data from Lee et al. and Skledar et al. Experimental and predicted mixture effects (EC10) of the mixtures in the ERα-UAS-bla GripTite for ERα.
Experimental absolute 10% effect (EC10) Standard Error of Mean (SE) for both fit models for the concentration-response curves (CRCs) of the mixtures
Best fit linear model for mixture experiments (eqn (3)) and linear model for prediction of concentration addition (eqn (10)) using single chemical EC10 from Srebny et al. 2025 (Table S1)
ERα	Experimental		Prediction
Mixture	EC10 (exp)	SE EC10 (exp)	EC10 (CA/IA)	SE EC10 (CA/IA)
I	4.76783e-07	1.54484e-08	7.64765e-07	1.02274e-08
II	1.24715e-07	5.5336e-09	9.24948e-08	5.32654e-11
III	5.85968e-07	3.05729e-08	1.44021e-07	3.95339e-09
I+II	1.59935e-07	1.01622e-08	1.40466e-07	2.0916e-10
I+III	3.52983e-07	1.44792e-08	2.05407e-07	5.3525e-09
II+III	1.69047e-07	6.20645e-09	1.13715e-07	1.32401e-09
I+II+III	2.08448e-07	8.50946e-09	1.41867e-07	1.66241e-09
Log-logistic fit for for experiments (eqn (5)) with Emax and b fitted (Table S6), concentration addition (CA) prediction (eqn (8)) and independent action (IA) prediction (eqn (9))
ERα	Experimental	Prediction
Mixture	EC10 (exp)	EC10 (CA)	EC10 (IA)
I	4.89222e-07	5.64906e-07	7.29458e-07
II	8.77104e-08	7.07946e-08	8.70964e-08
III	4.50885e-07	1.47911e-07	1.54882e-07
I+II	9.6791e-08	1.07152e-07	1.39637e-07
I+III	2.91059e-07	1.7378e-07	2.04174e-07
II+III	1.39032e-07	9.77237e-08	8.70964e+06
I+II+III	1.65131e-07	1.20226e-07	1.51356e-07
Log-logistic fit for for experiments (eqn (5)) with Emax fitted and b fixed to 1 (Table S6), general concentration addition model (GCA) (eqn (11))
ERα	Experimental	Prediction
Mixture	EC10 (exp) b=1	EC10 (CA)	Emax experimental (%)	Emax predicted (%) (eqn (15))
I	3.24989e-07	3.45129e-07	47.27	49.8
II	7.12427e-08	6.27105e-08	28.98	41
III	5.1567e-07	1.44544e-07	17.5	25
I+II	8.42915e-08	9.12011e-08	30.75	41.7
I+III	2.73755e-07	1.84511e-07	24.07	27.1
II+III	1.38194e-07	8.91251e-08	30.17	33.1
I+II+III	1.46816e-07	1.07152e-07	28.1	33.8
Log-logistic fit for for experiments (eqn (5)) with Emax and b fitted (Table S6), mixture predictions with toxic unit extrapolation model (TUE) (eqn (14))
ERα	Experimental
Mixture	EC10 (exp) b fitted	EC10 (CA)
I	4.89222e-07	5.62341e-07
II	8.77104e-08	7.07946e-08
III	4.50885e-07	1.47911e-07
I+II	9.6791e-08	1.07152e-07
I+III	2.91059e-07	1.77828e-07
II+III	1.39032e-07	9.77237e-08
I+II+III	1.65131e-07	1.20226e-07

## Sheet: S8 
Table S8. Mixture predictions for estrogen receptor alpha activation of various BPA alternative mixtures, calculated based on published data from Lee et al. and Skledar et al.
adapted from D. G. Skledar and L. P. Masic, In vitro estrogenic activity of binary and multicomponent mixtures with bisphenol A, Sci Total Environ, 2020, 707, 135211.
Condition	EC50 (exp) (µM)	SD EC50 (exp) (µM)	EC50 (CA) (µM)	ratio EC50(CA) / EC50(exp)
E2 (strong agonist)	2.14×10-5	0.32×10-5
17-α E2 (weak agonist)	0.0028	0.0013
BPA	1.14	0.16
BPF	4.39	1.01
BPAF	0.13	0.05
BPS	3.90	0.94
BPC	1.01	0.20
BPZ	1.16	0.31
Mix 1 (BPA + BPAF)	0.23	0.002	0.23	1
Mix 2 (BPA + BPF)	0.52	0.05	0.63	1.21154
Mix 3 (BPA + BPS)	1.30	0.68	1.76	1.35385
Mix 4 (BPA + BPZ)	2.33	0.78	2.63	1.12876
Mix 5 (BPA + BPC)	1.72	0.42	1.81	1.05233
Mix 6 (BPA + BPAF + BPF)	0.83	0.31	1.06	1.27711
Mix 7 (BPA + BPF + BPS)	0.98	0.23	1.14	1.16327
Mix 8 (BPA + BPAF + BPS)	0.33	0.002	0.34	1.0303
Mix 9 (BPA + BPF + BPAF)	1.94	0.09	1.78	0.917526
Mix 10 (BPA + BPAF + BPS)	0.37	0.03	0.33	0.891892
Mix 11 (BPA + BPAF + BPF)	1.51	0.30	1.98	1.31126
Mix 12 (BPA + BPS + BPZ)	1.86	0.16	2.21	1.18817
Mix 13 (BPA + BPF + BPS)	2.52	0.06	3.16	1.25397
Mix 14 (BPA + BPAF + BPF + BPS)	0.56	0.04	0.44	0.785714
Mix 15 (BPA + BPF + BPAF + BPS)	2.18	0.05	2.47	1.13303
Mix 16 (BPA + BPAF + BPF + BPZ)	0.99	0.15	1.29	1.30303
Mix 17 (BPA + BPAF + BPF + BPC)	0.43	0.02	0.40	0.930233
Mix 18 (BPA + BPAF + BPS + BPC)	1.35	0.32	1.78	1.31852
Mix 19 (BPA + BPAF + BPF + BPZ + BPC)	0.43	0.02	0.54	1.25581
Mix 20 (BPA + BPAF + BPF + BPS + BPC + BPZ)	1.46	0.54	1.97	1.34932
adapted from: H. Lee, J. Park and K. Park, Mixture Effects of Bisphenol A and Its Structural Analogs on Estrogen Receptor Transcriptional Activation, Toxics, 2023, 11.
Chemicals	ER Agonism		ER Antagonism
	EC10 (exp) (M)	EC10 (CA) (M)	IC30 (exp) (M)	IC30 (CA) (M)
BPA + BPAF	3.71535e-10	6.91831e-09
BPA + BPB	1.62181e-07	2.75423e-08
BPA + BPC	7.58578e-10	1.44544e-09
BPA + BPE	1.07152e-08	1e-08
BPA + BPZ	1.90546e-10	1e-08
BPS-MPE + BPP			4.46684e-08	1.69824e-08
2,4-BPS + BPP			9.77237e-09	1e-08
BPS-MPE + 2,4-BPS			7.94328e-09	1.14815e-08
BPA + BPAF + BPZ	3.16228e-09	1.12202e-08
BPAF + BPZ + BPB	1e-08	1.86209e-08
BPB + BPC + BPE	1e-08	5.88844e-09
BPC + BPE + BPA	2.95121e-09	2.45471e-09
BPZ + BPB + BPC	5.49541e-09	3.0903e-09
BPS-MPE + 2,4-BPS + BPP			2.23872e-08	1.23027e-08

## Sheet: S9
Table S9: Experimental mixture effects (EC10) and predictions for CA and IA of the mixtures in the MMP assay for mitochondrial membrane potential inhibition in AREc32 cells
Experimental absolute 10% effect (EC10) Standard Error of Mean (SE) for both fit models for the concentration-response curves (CRCs) of the mixtures.
Best fit linear model for mixture experiments (eqn (3)) with eqn (4) used for EC10, and linear model for prediction of concentration addition (eqn (10)) using single chemical EC10 from Srebny et al. 2025 (Table S1)
MMP	Experimental		Prediction eqn (10)
Mixture	EC10 (exp)	SE EC10 (exp)	EC10 (CA/IA)	SE EC10 (CA/IA)
I	2.87191e-05	4.59209e-06	6.2031e-05	2.95336e-06
II	1.07721e-05	1.20989e-06	1.41471e-05	5.27947e-07
III	9.87937e-06	1.84787e-06	6.63407e-06	5.83321e-07
I+II	1.1689e-05	1.43559e-06	2.02072e-05	7.80421e-07
I+III	2.21021e-05	4.54079e-06	9.88407e-06	8.45707e-07
II+III	2.08104e-05	5.47857e-06	8.89372e-06	6.46631e-07
I+II+III	1.31663e-05	1.73011e-06	1.11127e-05	7.96319e-07
Best fit log-logistic model for experiments (eqn (5)) with eqn (6) used for EC10 from Table S6 with Emax = 100% and predictions for concentration addition (eqn (8)) with Emax = 100% and independent action (eqn (9)) using single chemical EC10 from Table S6
MMP	Experimental	Prediction eqn (8)	eqn (9)
Mixture	EC10 (exp)	EC10 (CA)	EC10 (IA)
I	3.9736e-05	5.62341e-05	7.94328e-05
II	1.78861e-05	1.31826e-05	2.34423e-05
III	9.42064e-06	6.60693e-06	7.58578e-06
I+II	1.08373e-05	1.90546e-05	3.80189e-05
I+III	1.78932e-05	9.77237e-06	1.20226e-05
II+III	1.26949e-05	8.70964e-06	1.44544e-05
I+II+III	9.11644e-06	1.07152e-05	1.90546e-05

[truncated: 4 more sheets: S10, S11, S12, S13]
